# Supplementary material for: Iron(ii) carboxylates and simple carboxamides: an inexpensive and modular catalyst system for the synthesis of PLLA and PLLA-PCL block copolymers
Source: Royal Society of Chemistry journal article supplement (doi:10.1039/d3ra03112h), 2023-01-01
Supplement: d3ra03112h1.pdf [file d3ra03112h1.pdf]

# Iron(II) Carboxylates and Simple Carboxamides: An Inexpensive and Modular Catalyst System for the Synthesis of PLLA and PLLA-PCL Block Copolymers

## Supporting Information

Sarah Kirchhecker<sup>1</sup>, Ngoc Nguyen<sup>2</sup>, Stefan Reichert<sup>3</sup>, Karola Lützow<sup>1</sup>, Paul Eselem Bungu<sup>1</sup>, Axel Jacobi von Wangelin<sup>3</sup>, Sebastian Sandl<sup>3</sup> and Axel T. Neffe<sup>1,2\*</sup>

1: Institute for Active Polymers, Helmholtz Zentrum Hereon, Kantstr. 55, 14513 Teltow, Germany

2: Institute for Technical and Macromolecular Chemistry, University of Hamburg, Bundesstrasse 55, 20146 Hamburg, Germany

3: Department of Chemistry, University of Hamburg, Martin-Luther-King-Platz 6, 20146 Hamburg, Germany

\*: to whom correspondence should be addressed: [axel.neffe@hereon.de](mailto:axel.neffe@hereon.de)

- S1. NMR spectrum of PLLA indicating peaks used for calculations
- S2. Formulas used for calculations
- S3. MALDI and GPC spectra of PLLA synthesized with different amide adjuncts
- S4. PLLA polymerized with Fe(OPv)<sub>2</sub> and different amides as catalyst
- S5. MALDI and GPC spectra of PLLA at different molar masses
- S6. Kinetics of LL and CL homo- and copolymerisations
- S7. NMR spectrum of copolymer indicating the peaks used for calculations
- S8. GPC traces of copolymers
- S9. MALDI spectra of selected copolymers
- S10. Glycolide copolymerisation
- S11. DSC investigations /thermal transitions

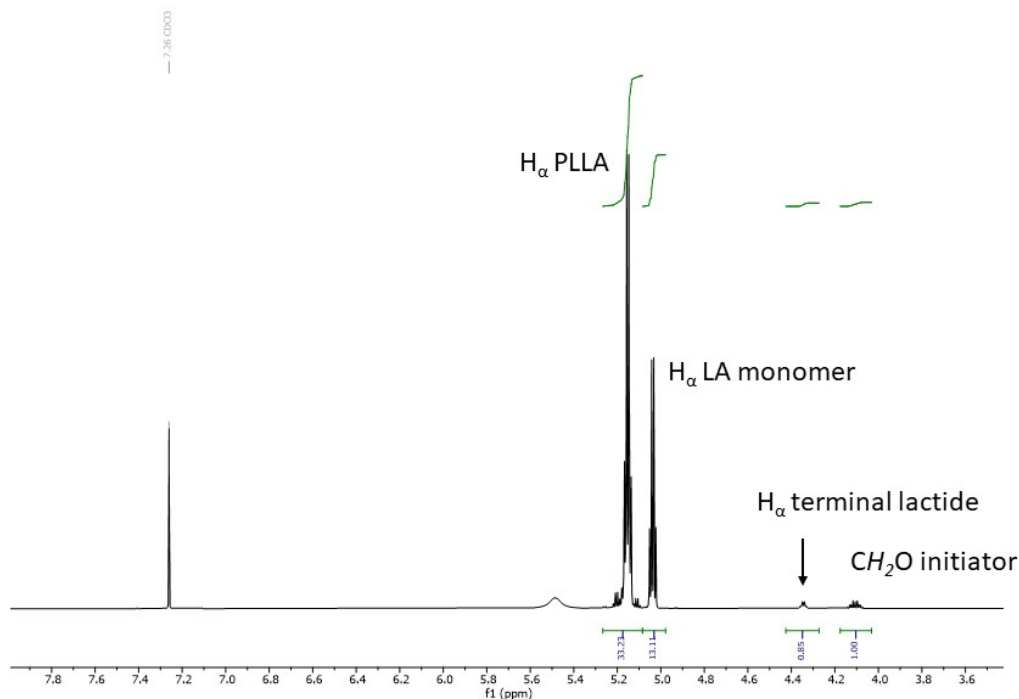

**Figure S1. NMR spectrum of PLLA indicating the peaks used for calculation of conversion,  $M_n$  and incorporation of initiator**

The determination of the number average molecular weight  $M_n$  from the  $^1\text{H}$  spectra was performed by comparing the integrals of the  $\text{CH}_2\text{-O}$  group of the initiator (4.11–3.96 ppm) with the CH protons of the lactic acid unit (5.33–4.86 and 4.37–4.22 ppm).

## S2. Formulas used for calculations in Table 1

$$\text{Conversion} = 100 * \frac{(I_{H_{\alpha, \text{polylactide}}} + I_{H_{\alpha, \text{terminal lactide}}})}{(I_{H_{\alpha, \text{polylactide}}} + I_{H_{\alpha, \text{terminal lactide}}} + I_{H_{\alpha, \text{monomer}}})} \quad \text{Eq. 1}$$

$$\% \text{telechelic} = 100\% \cdot \frac{I_{H_{\alpha, \text{terminal lactide}}}}{(I_{H_{\alpha, \text{terminal lactide}}} - \frac{I_{\text{CH}_2\text{O}_{\text{ini.}}}}{2})} \quad \text{Eq. 2}$$

$$M_{n, \text{telechel}} = 2 \cdot \frac{2(I_{H_{\alpha, \text{polylactide}}} + I_{H_{\alpha, \text{terminal lactide}}})}{I_{\text{CH}_2\text{O}_{\text{ini.}}}} \cdot 72.07 \text{ g} \cdot \text{mol}^{-1} + 146.227 \text{ g} \cdot \text{mol}^{-1} \quad \text{Eq. 3}$$

$$M_{n,\text{OH-initialized}} = \left( \frac{I_{H_{\alpha,\text{polylactide}}}}{H_{\alpha,\text{terminal lactide}}} + 1 \right) \cdot 72.07 \text{ g} \cdot \text{mol}^{-1} + 18.015 \text{ g} \cdot \text{mol}^{-1} \quad \text{Eq. 4}$$

$$M_n(\text{NMR}) = \frac{\% \text{ telechelic}}{100} \cdot M_{n,\text{telechel}} + \left( 1 - \frac{\% \text{ telechelic}}{100} \right) \cdot M_{n,\text{OH-initialized}} \quad \text{Eq. 5}$$

### S3. MALDI spectra and GPC chromatogrammes of PLLA synthesized with different amides

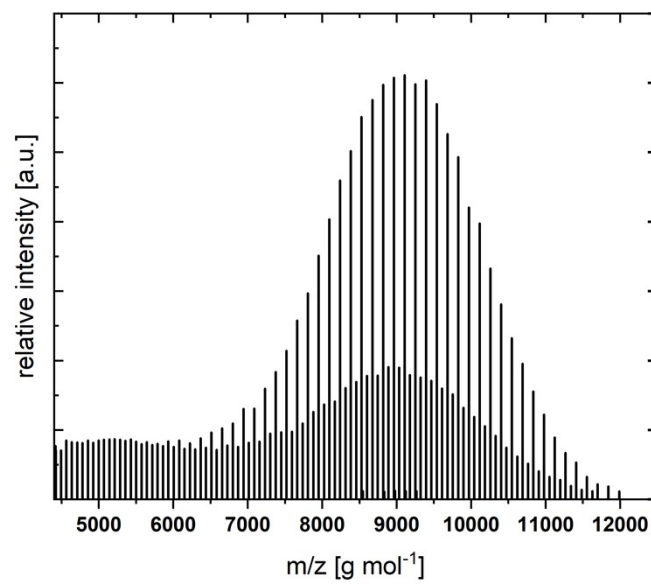

**Figure S3.1.1** MALDI spectrum of **PLLA-EAA**

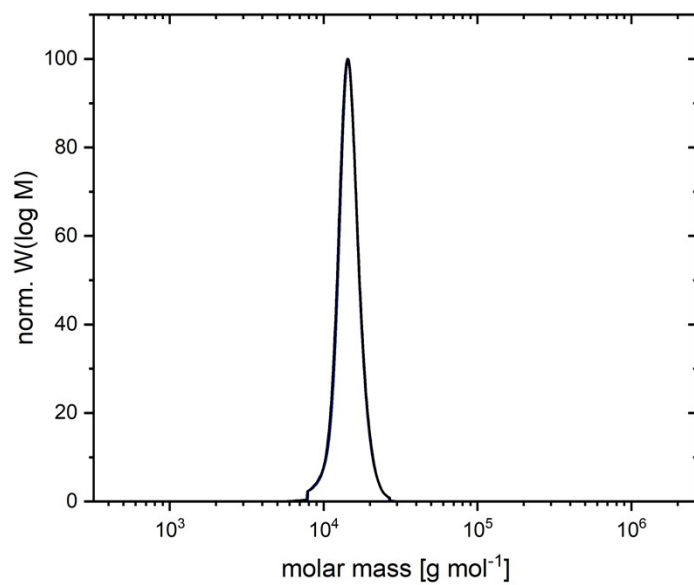

**Figure S3.1.2** GPC chromatogramme of **PLLA-EAA** (measured in duplicate)

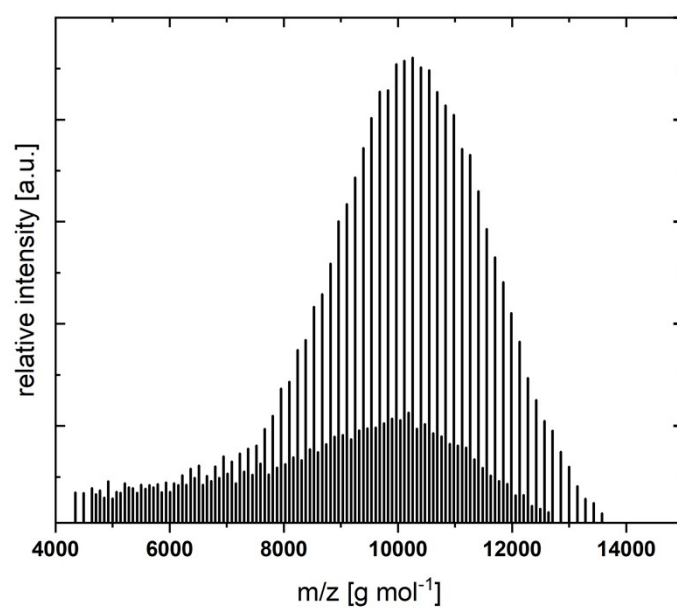

**Figure S3.2.1** MALDI spectrum of **PLLA-DEAA**

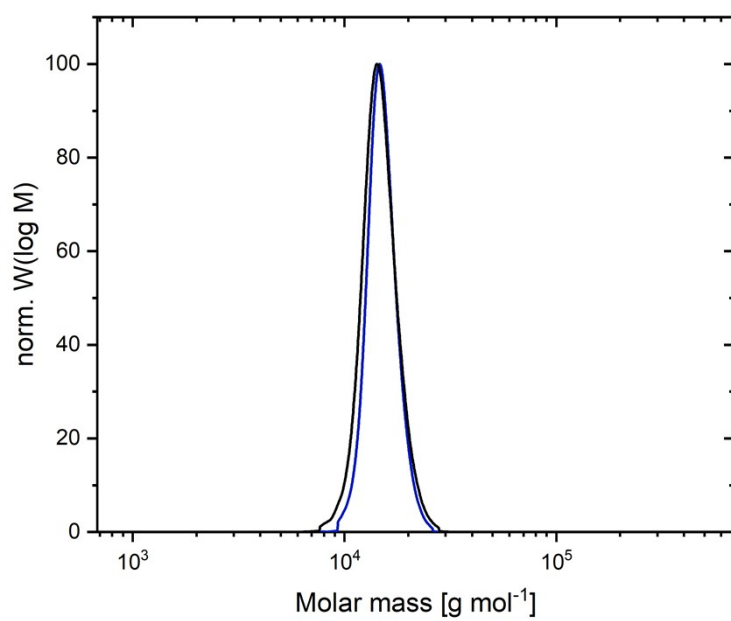

**Figure S3.2.2** GPC chromatogramme of **PLLA-DEAA** (measured in duplicate)

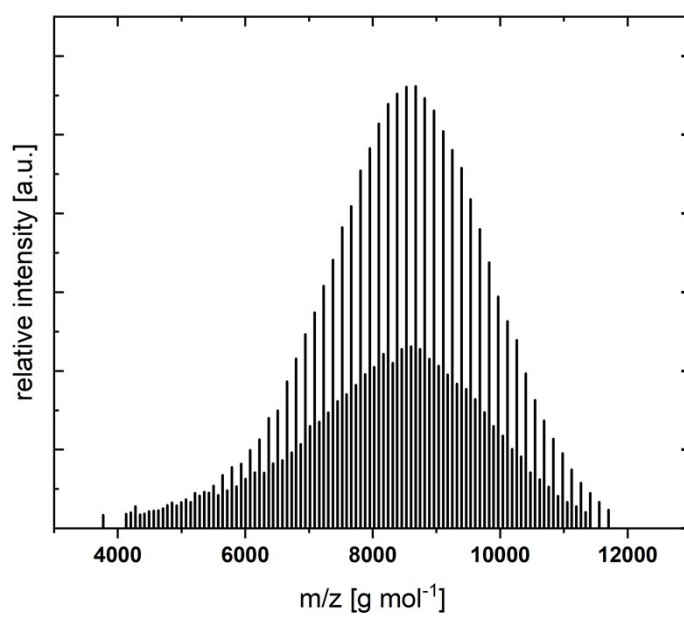

**Figure S3.3.1** MALDI spectrum of **PLLA-DMAA**

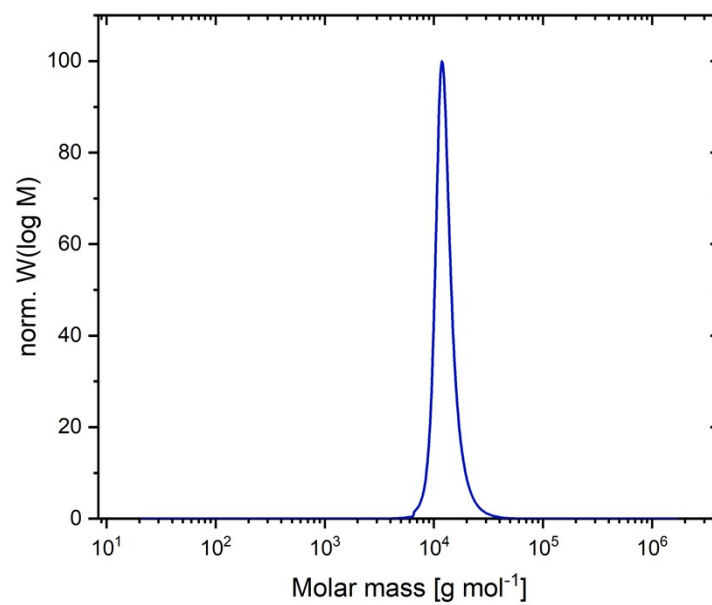

**Figure S3.3.2** GPC chromatogramme of **PLLA-DMAA** (measured in duplicate)

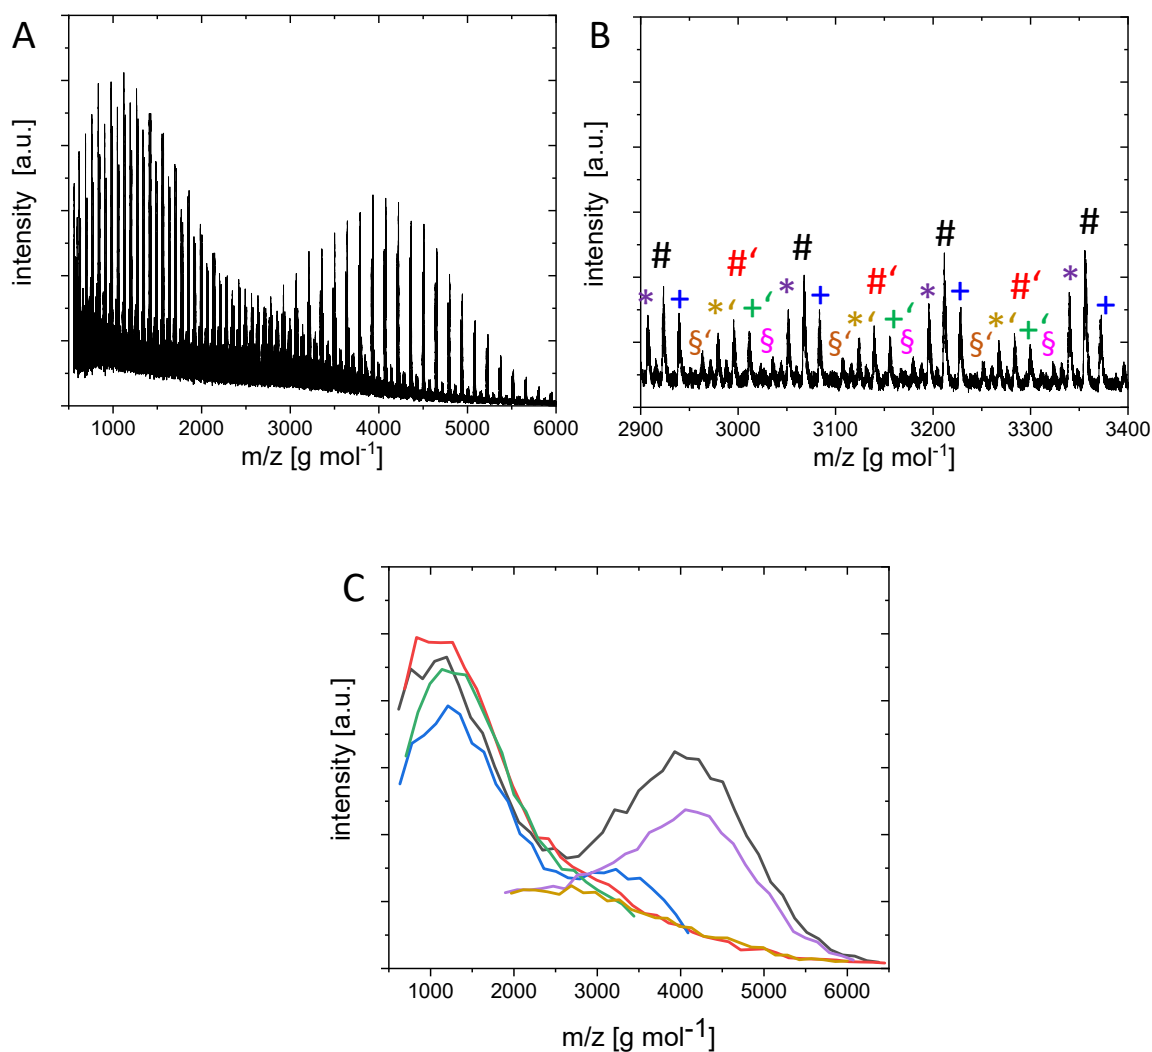

\*:  $\text{In}-(\text{LA})_x+\text{Na}^+$  ( $x = 2n$ ) #:  $[\text{In}-(\text{LA})_x+\text{K}^+]*f + [\text{H}_2\text{O}-(\text{LA})_{x+2}+\text{Na}^+](x = 2n)$  +:  $[\text{H}_2\text{O}-(\text{LA})_{x+2}+\text{K}^+]*f$  ( $x = 2n$ ) §:  $\text{In}-(\text{LA})_x+\text{H}^+$  ( $x = 2n$ ) \*':  $\text{In}-(\text{LA})_x+\text{Na}^+$  ( $x = 2n+1$ ) #'':  $[\text{In}-(\text{LA})_x+\text{K}^+]*f + [\text{H}_2\text{O}-(\text{LA})_{x+2}+\text{Na}^+](x = 2n+1)$  +':  $[\text{H}_2\text{O}-(\text{LA})_{x+2}+\text{K}^+]*f$  ( $x = 2n+1$ ) §':  $\text{In}-(\text{LA})_x+\text{H}^+$  ( $x = 2n+1$ )

NB: these MALDI measurements were performed on a different machine without an added  $\text{Na}^+$  source, therefore the spectra are more complex

**Figure S3.4** MALDI spectrum of PLLA-tBuAA

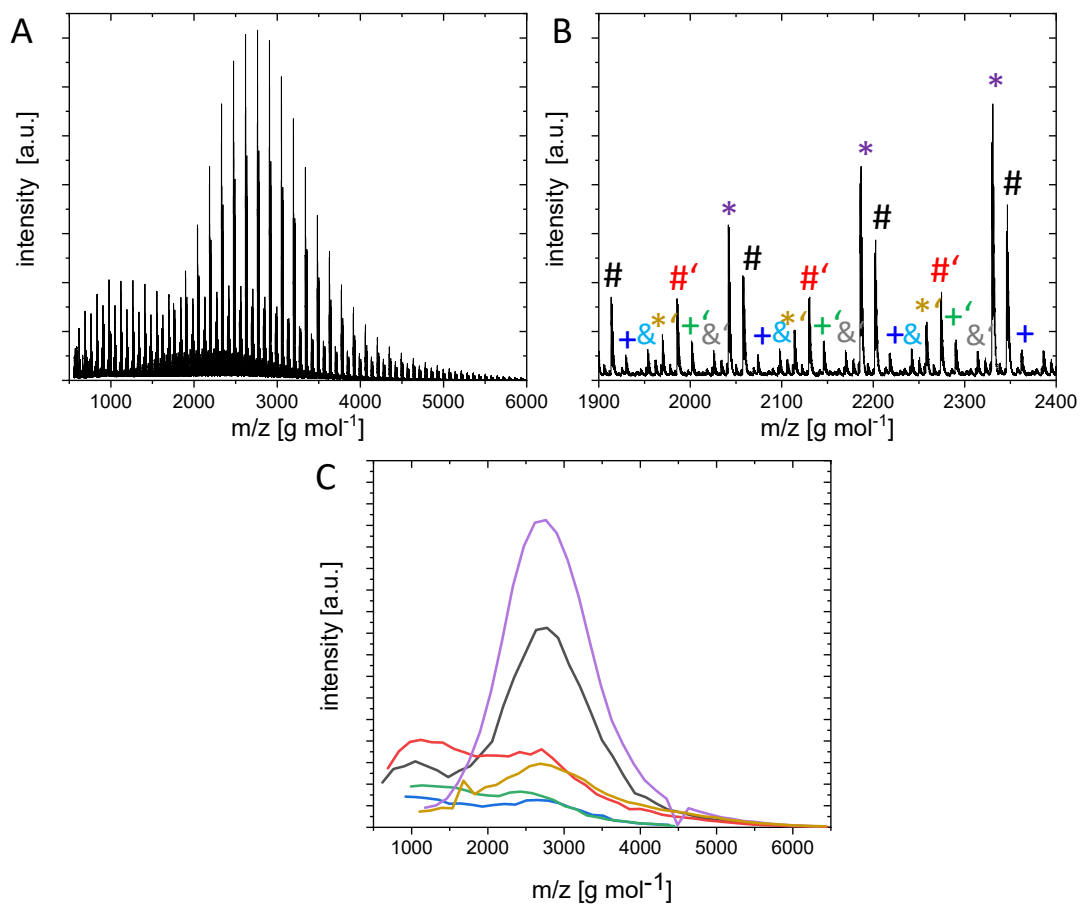

\*:  $\text{In}-(\text{LA})_x+\text{Na}^+$  ( $x = 2n$ ) #:  $[\text{In}-(\text{LA})_x+\text{K}^+]*f + [\text{H}_2\text{O}-(\text{LA})_{x+2}+\text{Na}^+](x = 2n)$  +:  $[\text{H}_2\text{O}-(\text{LA})_{x+2}+\text{K}^+]*f$  ( $x = 2n$ ) §:  $\text{In}-(\text{LA})_x+\text{H}^+$  ( $x = 2n$ ) \*':  $\text{In}-(\text{LA})_x+\text{Na}^+$  ( $x = 2n+1$ ) #'':  $[\text{In}-(\text{LA})_x+\text{K}^+]*f + [\text{H}_2\text{O}-(\text{LA})_{x+2}+\text{Na}^+](x = 2n+1)$  +':  $[\text{H}_2\text{O}-(\text{LA})_{x+2}+\text{K}^+]*f$  ( $x = 2n+1$ ) §':  $\text{In}-(\text{LA})_x+\text{H}^+$  ( $x = 2n+1$ ), &:  $\text{In}-(\text{LA})_x+\text{FeOAc}^+$  ( $x = 2n$ ), &':  $\text{In}-(\text{LA})_x+\text{FeOAc}^+$  ( $x = 2n+1$ )

**Figure S3.5** MALDI spectrum of PLLA-AcAn



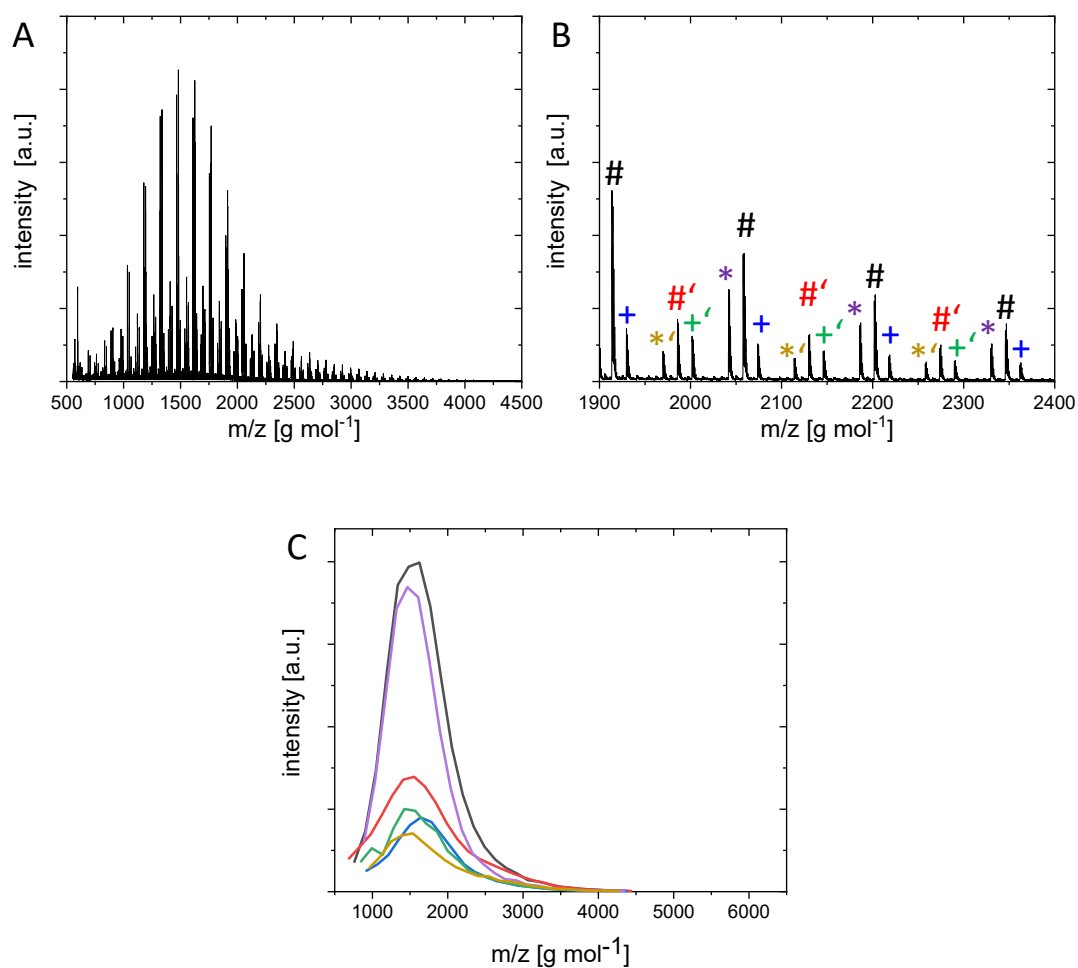

\*:  $\text{In}-(\text{LA})_x+\text{Na}^+$  ( $x = 2n$ ) #:  $[\text{In}-(\text{LA})_x+\text{K}^+]*f + [\text{H}_2\text{O}-(\text{LA})_{x+2}+\text{Na}^+](x = 2n)$  +:  $[\text{H}_2\text{O}-(\text{LA})_{x+2}+\text{K}^+]*f$  ( $x = 2n$ ) §:  $\text{In}-(\text{LA})_x+\text{H}^+$  ( $x = 2n$ ) \*':  $\text{In}-(\text{LA})_x+\text{Na}^+$  ( $x = 2n+1$ ) #'':  $[\text{In}-(\text{LA})_x+\text{K}^+]*f + [\text{H}_2\text{O}-(\text{LA})_{x+2}+\text{Na}^+](x = 2n+1)$  +':  $[\text{H}_2\text{O}-(\text{LA})_{x+2}+\text{K}^+]*f$  ( $x = 2n+1$ ) §':  $\text{In}-(\text{LA})_x+\text{H}^+$  ( $x = 2n+1$ ).

**Figure S3.6** MALDI spectrum of PLLA-DMAAP

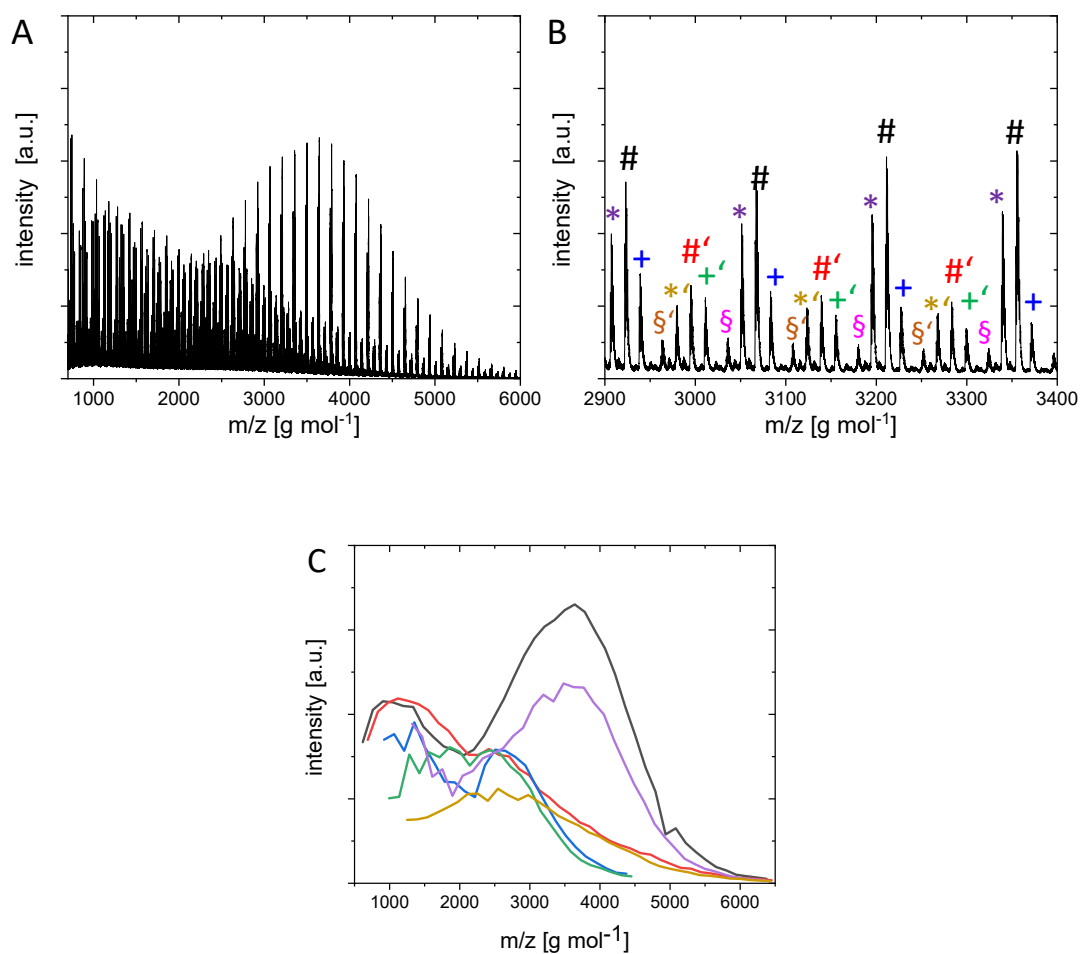

\*:  $\text{In}-(\text{LA})_x+\text{Na}^+$  ( $x = 2n$ ) #:  $[\text{In}-(\text{LA})_x+\text{K}^+]*f + [\text{H}_2\text{O}-(\text{LA})_{x+2}+\text{Na}^+](x = 2n)$  +:  $[\text{H}_2\text{O}-(\text{LA})_{x+2}+\text{K}^+]*f$  ( $x = 2n$ ) §:  $\text{In}-(\text{LA})_x+\text{H}^+$  ( $x = 2n$ ) \*':  $\text{In}-(\text{LA})_x+\text{Na}^+$  ( $x = 2n+1$ ) #' :  $[\text{In}-(\text{LA})_x+\text{K}^+]*f + [\text{H}_2\text{O}-(\text{LA})_{x+2}+\text{Na}^+](x = 2n+1)$  +' :  $[\text{H}_2\text{O}-(\text{LA})_{x+2}+\text{K}^+]*f$  ( $x = 2n+1$ ) §' :  $\text{In}-(\text{LA})_x+\text{H}^+$  ( $x = 2n+1$ ).

**Figure S3.7** MALDI spectrum of PLLA-CIDEAA

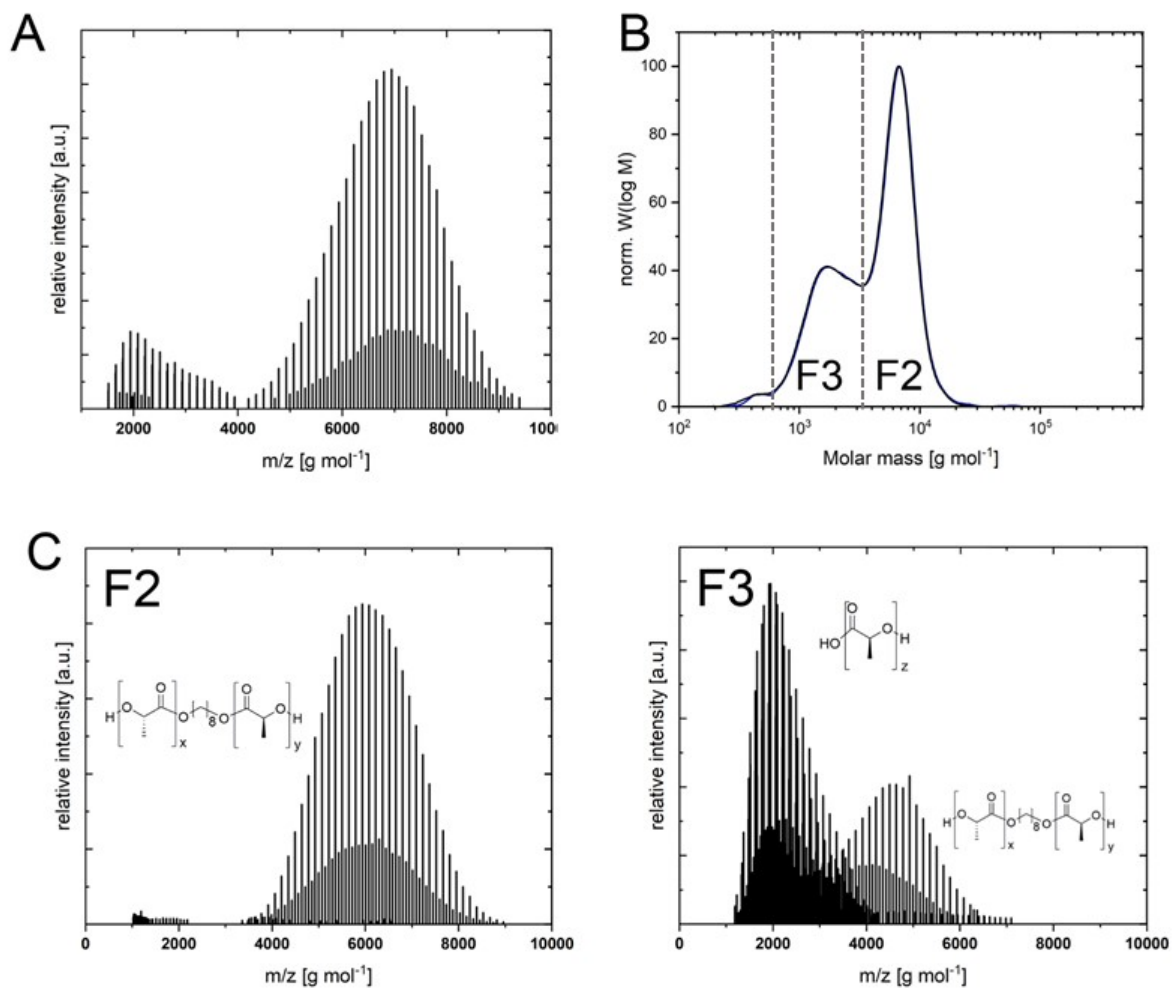

**Figure S3.8** GPC and MALDI analysis of **PLLA-urea**. A) MALDI spectrum, B) GPC chromatogram indicating the fractions collected. C) MALDI spectra of fractionations with the corresponding polymers structures.

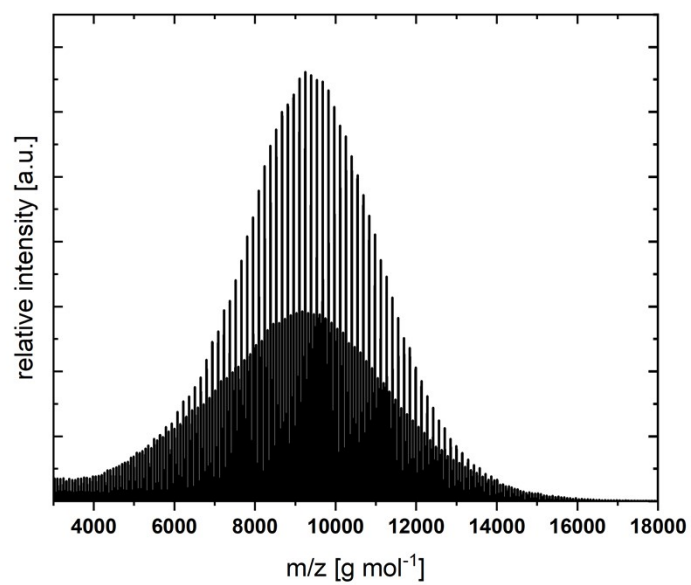

**Figure S3.9.1** MALDI spectrum of **PLLA-TMU**

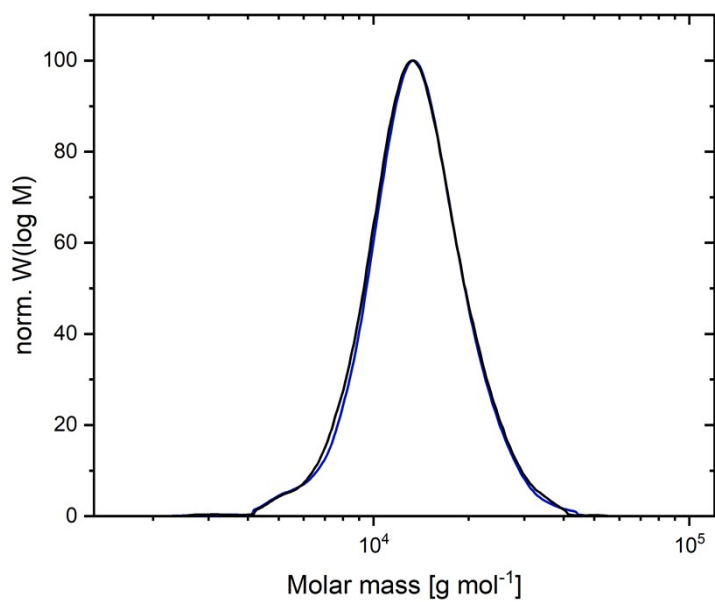

**Figure S3.9.2** GPC chromatogramme of **PLLA-TMU** (measured in duplicate)

#### S4. Polymerisation of L-lactide with Fe(OPv)<sub>2</sub> and amides as catalyst

**Table S4.1** NMR and MALDI analysis of PLLA synthesised with Fe(OPiv)<sub>2</sub>

| Polymer           | Conversion [%] | Ini [%] | M <sub>n</sub> NMR [g mol <sup>-1</sup> ] | M <sub>n</sub> MALDI [g mol <sup>-1</sup> ] | M <sub>w</sub> MALDI [g mol <sup>-1</sup> ] | $\bar{D}$ | 2n:2n+1 [%] |
|-------------------|----------------|---------|-------------------------------------------|---------------------------------------------|---------------------------------------------|-----------|-------------|
| <b>Piv-EAA</b>    | 98             | 84      | 7550                                      | 1175                                        | 1260                                        | 1.07      | 64          |
| <b>Piv-DEAA</b>   | 89             | 93      | 10190                                     |                                             |                                             | 1.89      | 42          |
|                   |                |         |                                           | 1435                                        | 2715                                        |           |             |
| <b>Piv-tBuAA</b>  | 50             | 83      | 5100                                      | 2220                                        | 3180                                        | 1.43      | 54          |
| <b>Piv-AcAn</b>   | 43             | 92      | 4330                                      | 2545                                        | 3325                                        | 1.31      | 53          |
| <b>Piv-DMAAp</b>  | 20             | 86      | 1800                                      |                                             | Not acquired                                |           |             |
| <b>Piv-CIDEAA</b> | 32             | 46      | 2440                                      | 2635                                        | 3005                                        | 1.14      | 66          |
| <b>Piv-Urea</b>   | 86             | 40      | 2400                                      |                                             | Not acquired                                |           |             |
| <b>Piv-DMUrea</b> | 73             | 23      | 1040                                      |                                             | Not acquired                                |           |             |

S5. MALDI spectra and GPC chromatogrammes of PLLA with targeted molecular weights

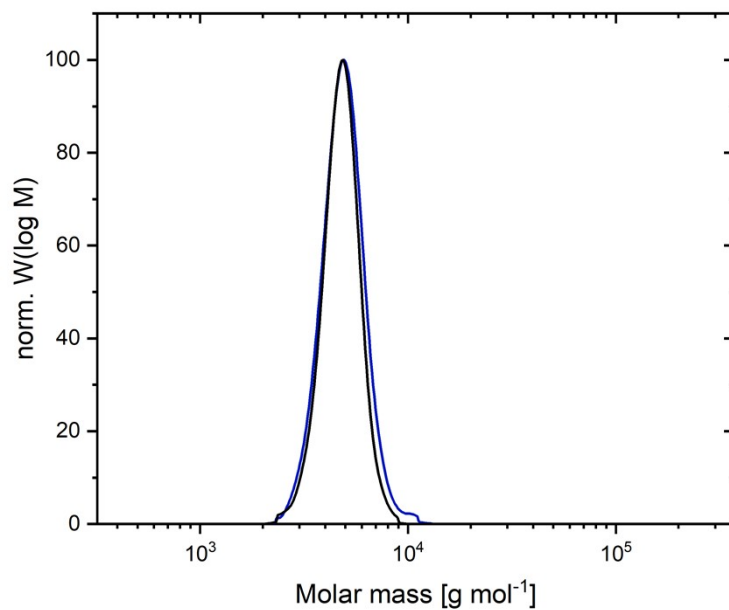

Figure S5.1.1 GPC chromatogramme of PLLA-DEAA-5k (measured in duplicate)

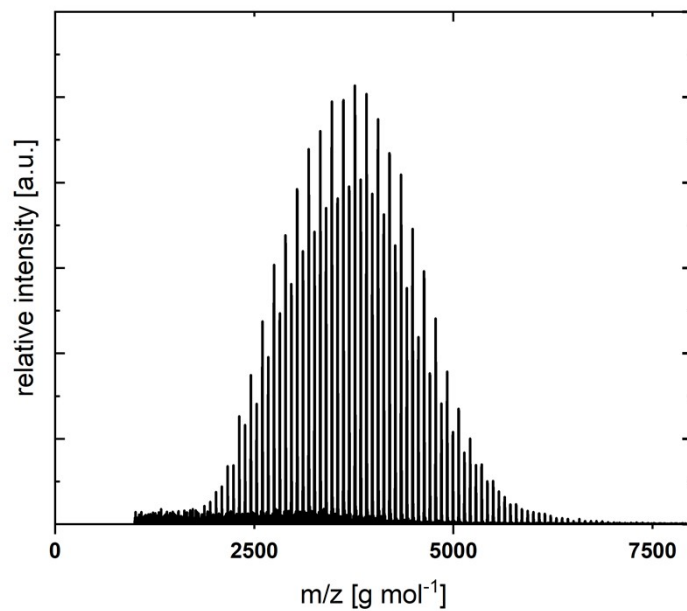

Figure S5.1.2 MALDI spectrum for PLLA-DEAA-5k

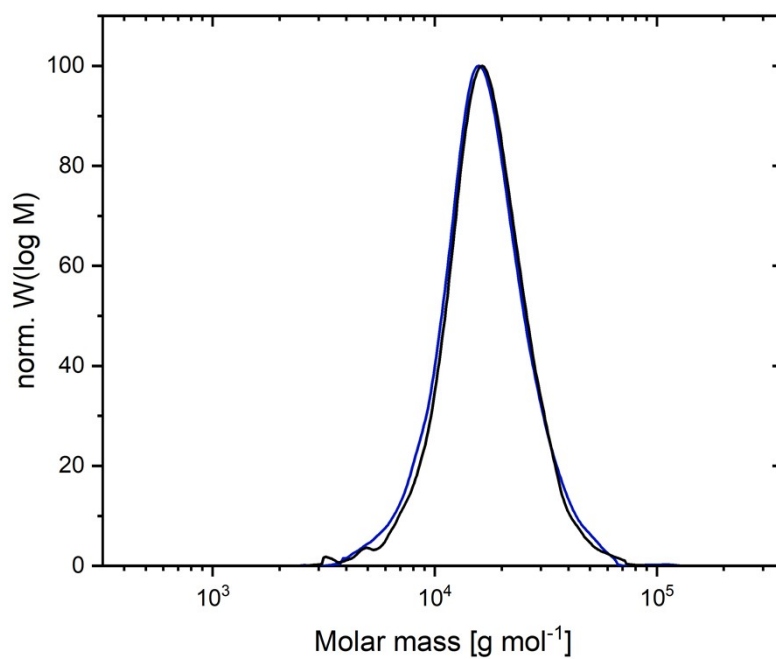

**Figure S5.2.1** GPC chromatogramme of **PLLA-DEAA-15k** (measured in duplicate)

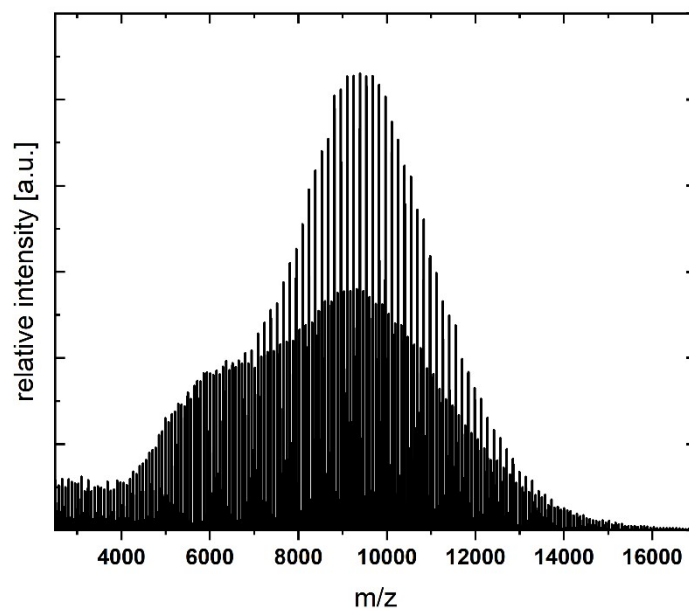

**Figure S5.2.2** MALDI spectrum for **PLLA-DEAA-15k**

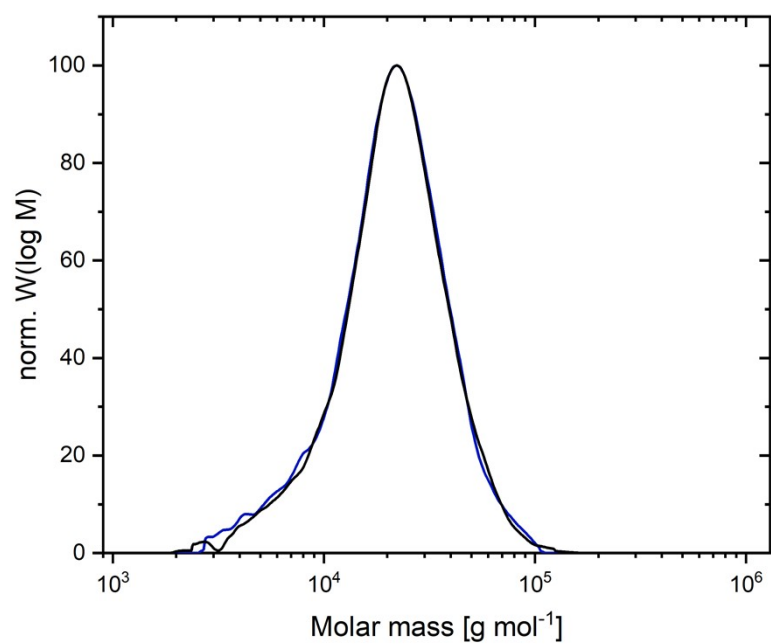

**Figure S5.3.1** GPC chromatogramme of **PLLA-DEAA-25k** (measured in duplicate)

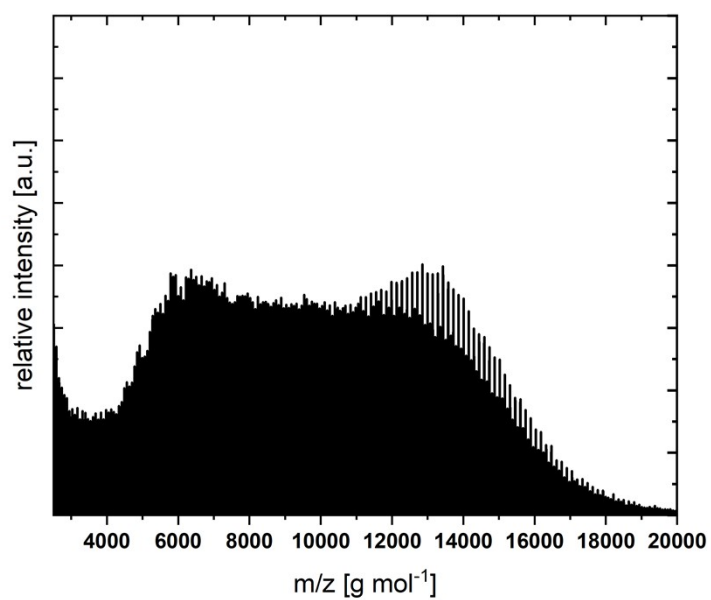

**Figure S5.3.2** MALDI spectrum for **PLLA-DEAA-25k**



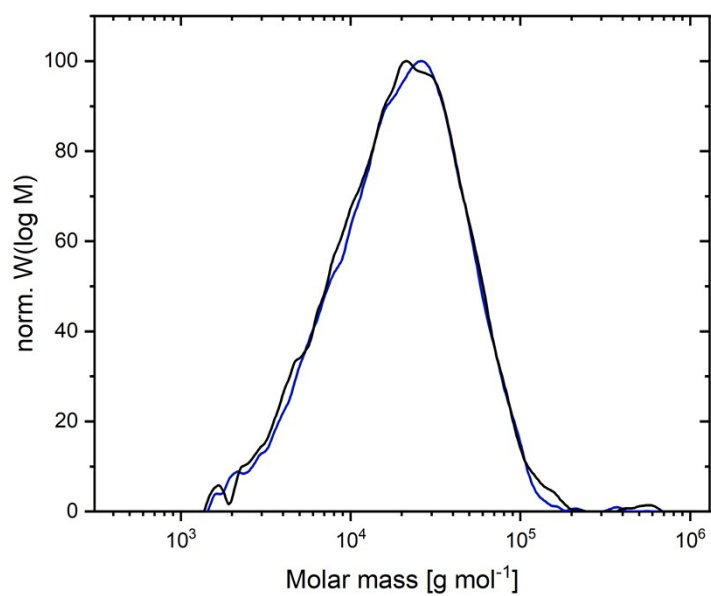

**Figure S5.4.1** GPC chromatogramme of **PLLA-DEAA-50k** (measured in duplicate)

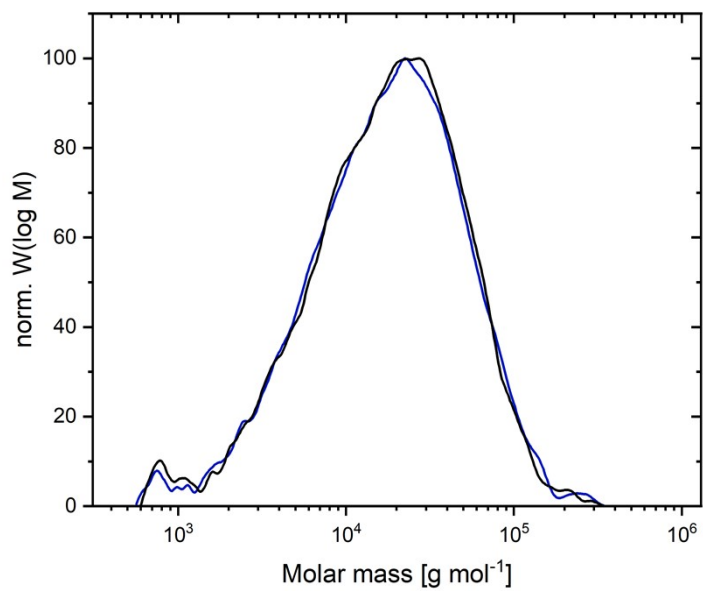

**Figure S5.5.1** GPC chromatogramme of **PLLA-DEAA-100k** (measured in duplicate)

### S6. Kinetics of Polymerisations of lactide (L-LA<sub>2</sub>) and caprolactone (CL) by the catalyst system.

Homopolymerisations were performed with DEAA as amide at 105 °C for (L-LA)<sub>2</sub> and 105 °C and 140 °C for CL. Additionally the rates were determined per monomer for a 1:1 copolymerisation mixture. The conversion of monomers was calculated by integration of the <sup>1</sup>H-NMR spectrum. For lactide the methine H<sub>α</sub> peak was used (q at 5.16 - 5.13 ppm for polymer plus terminal H<sub>α</sub> (4.35 – 4.31 ppm) against 5.05 - 5.03 ppm for monomer) and for CL the ε-CH<sub>2</sub> peak (4.07-4.03 ppm) against the monomer at 4.23-4.20 ppm)

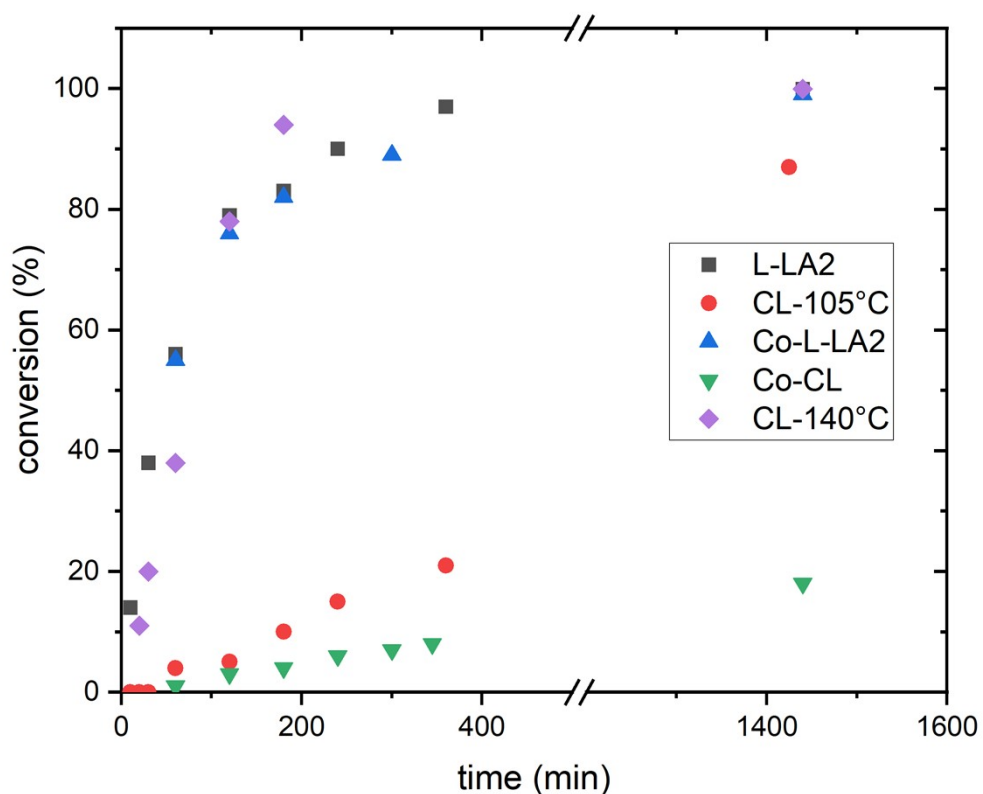

S7. NMR spectrum of copolymer indicating the peaks used for calculation of molar ratios, randomness and average chain lengths

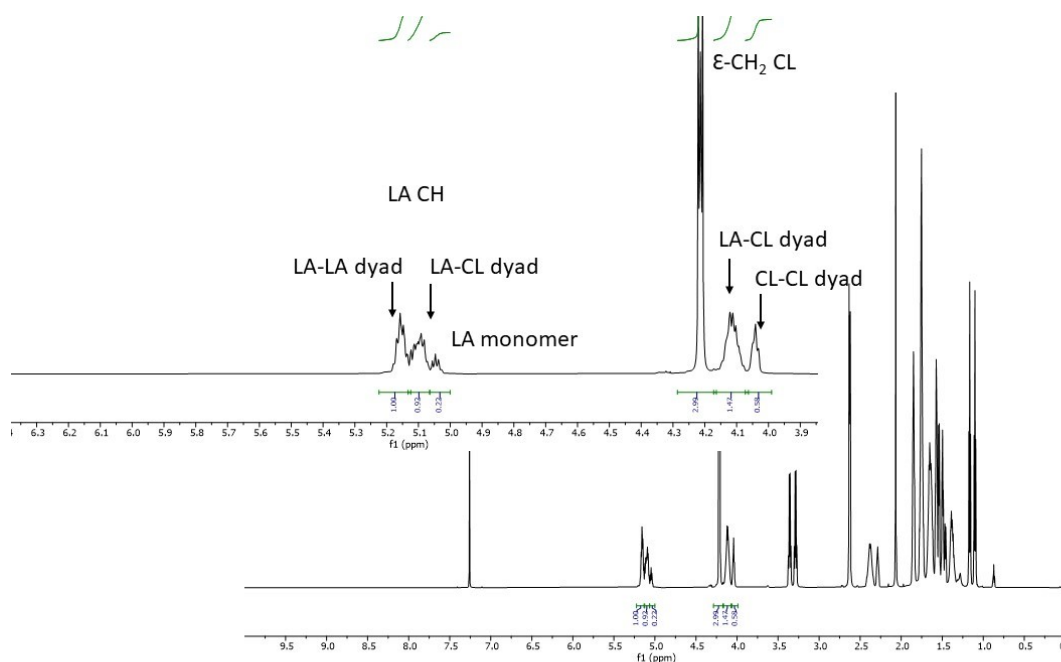

S8. GPC chromatogrammes of homo- and copolymers

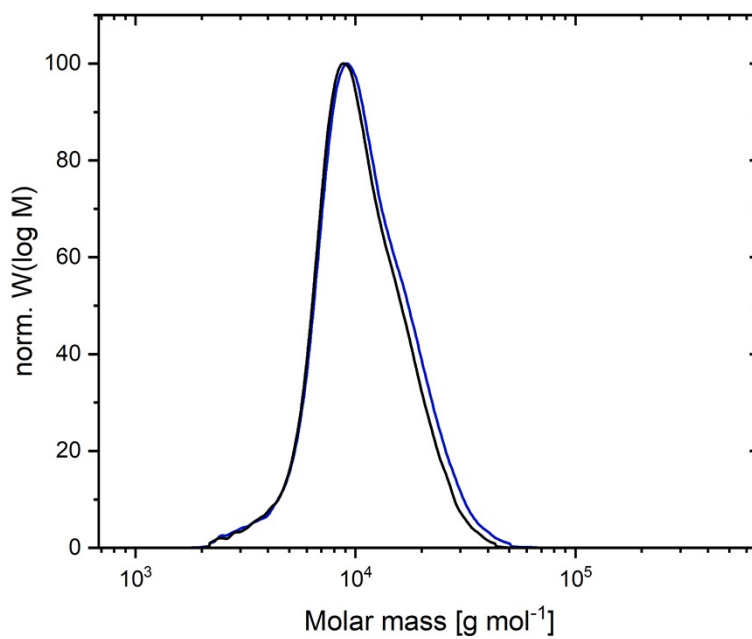

Figure S8.1 GPC chromatogramme of PLLA-DEAA-hex (measured in duplicate)

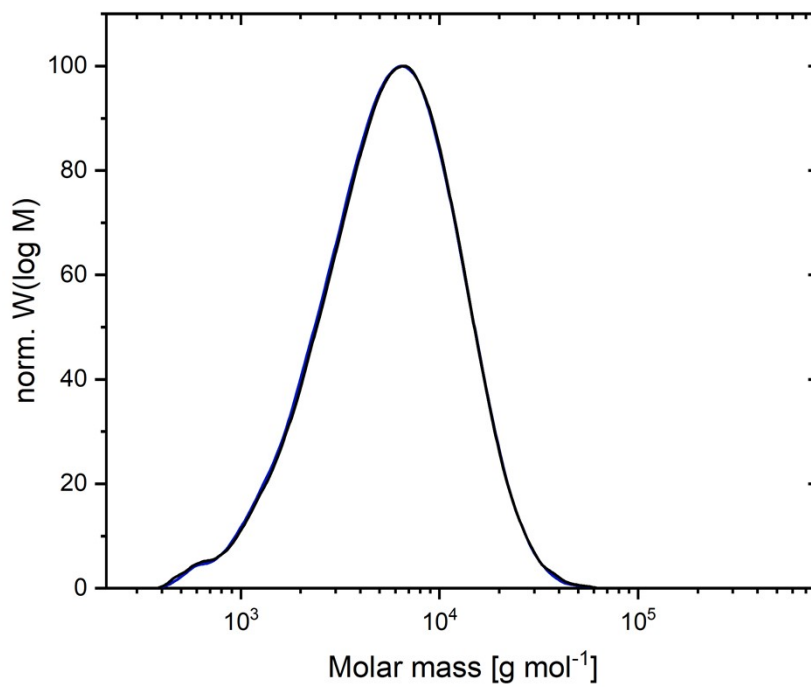

**Figure S8.2** GPC chromatogramme of **PCL-DEAA-hex** (measured in duplicate)

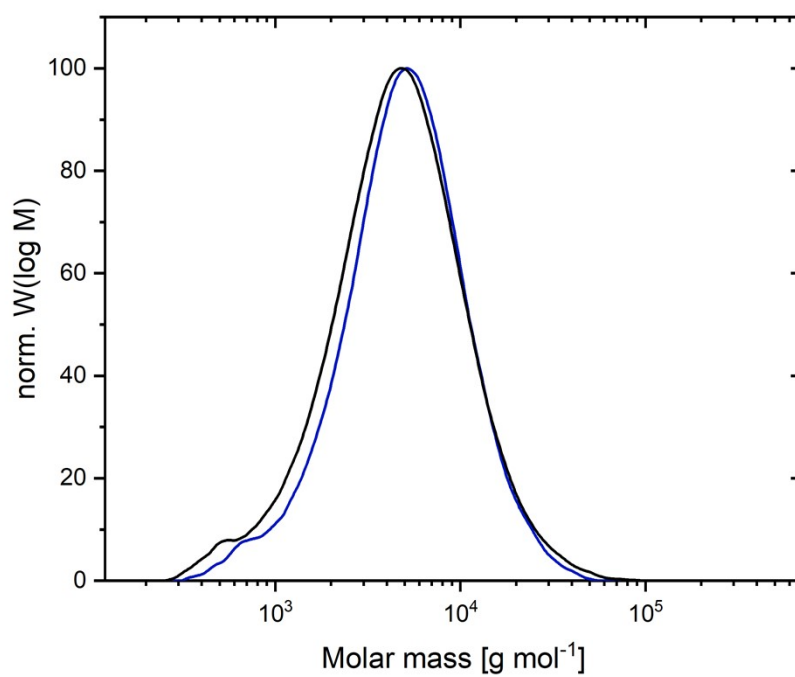

**Figure S8.3** GPC chromatogramme of **PLLA-grad-PCL-105** (measured in duplicate)

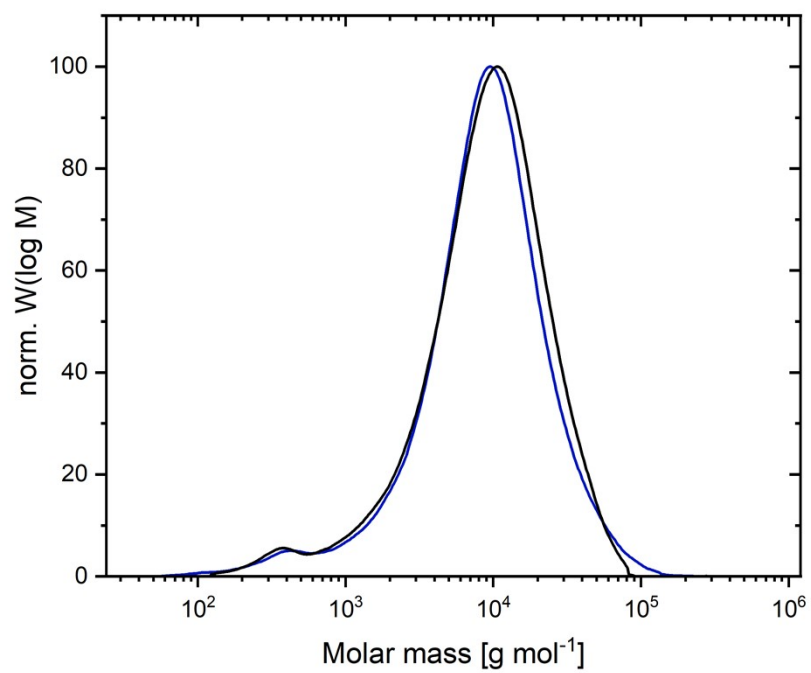

**Figure S8.4** GPC chromatogramme of **PLLA-grad-PCL-140** (measured in duplicate)

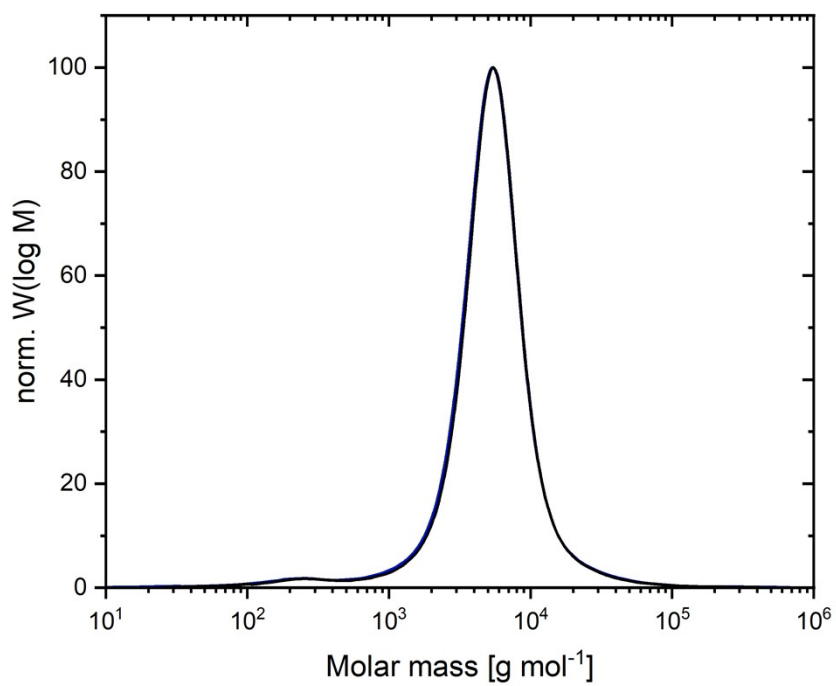

**Figure S8.5** GPC chromatogramme of **PLLA-b-PCL-105** (measured in duplicate)

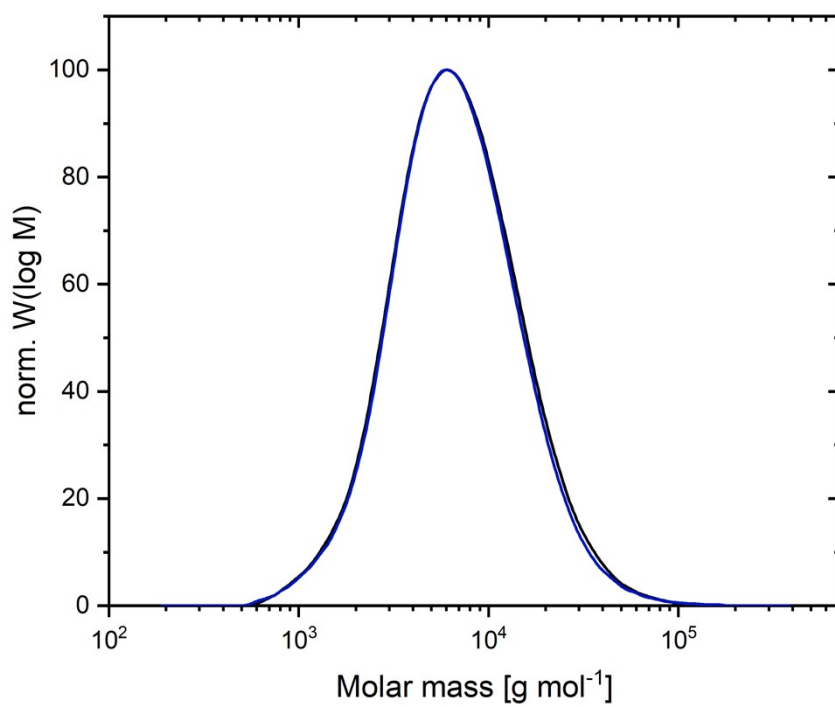

**Figure S8.6** GPC chromatogramme of PCL-*b*-PLLA-140 (measured in duplicate)

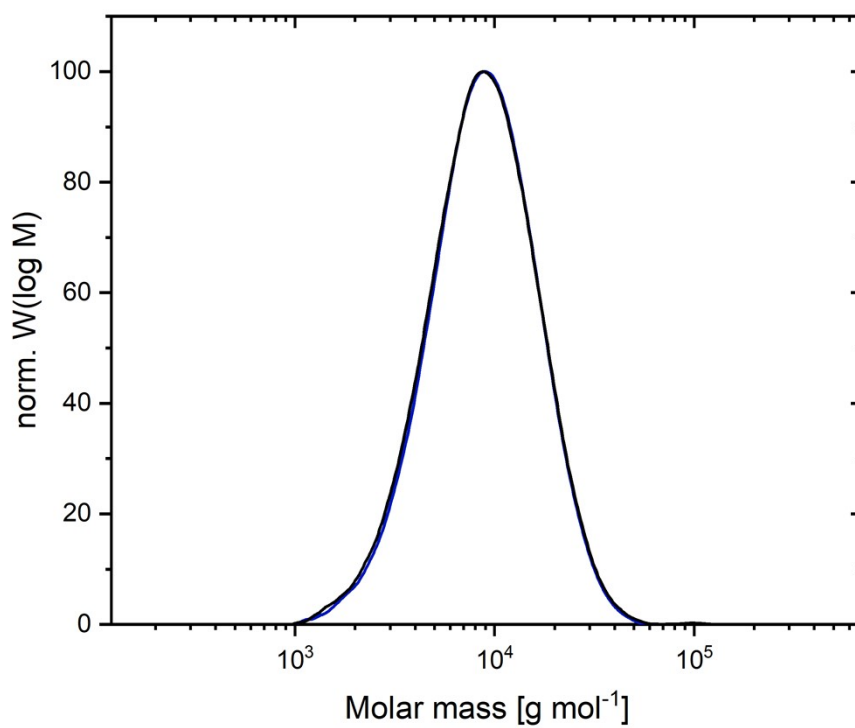

**Figure S8.7** GPC chromatogramme of PCL-*b*-PLLA-140-105 (measured in duplicate)

## S9. Selected MALDI spectra of copolymers

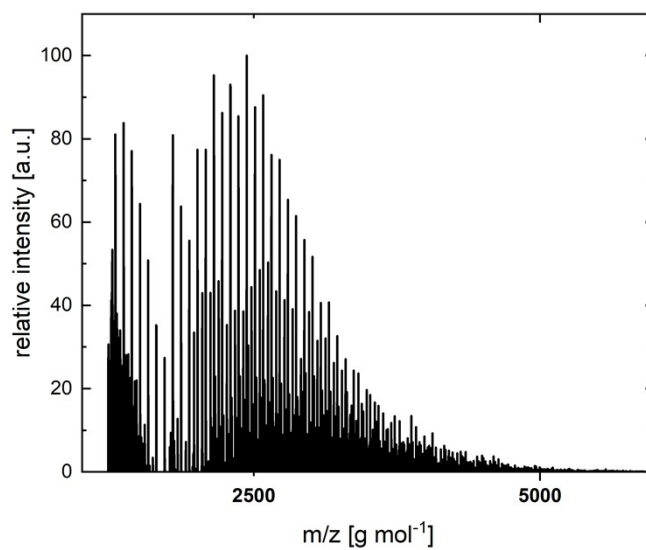

Figure S9.1 MALDI spectrum of **PLLA-grad-PCL**

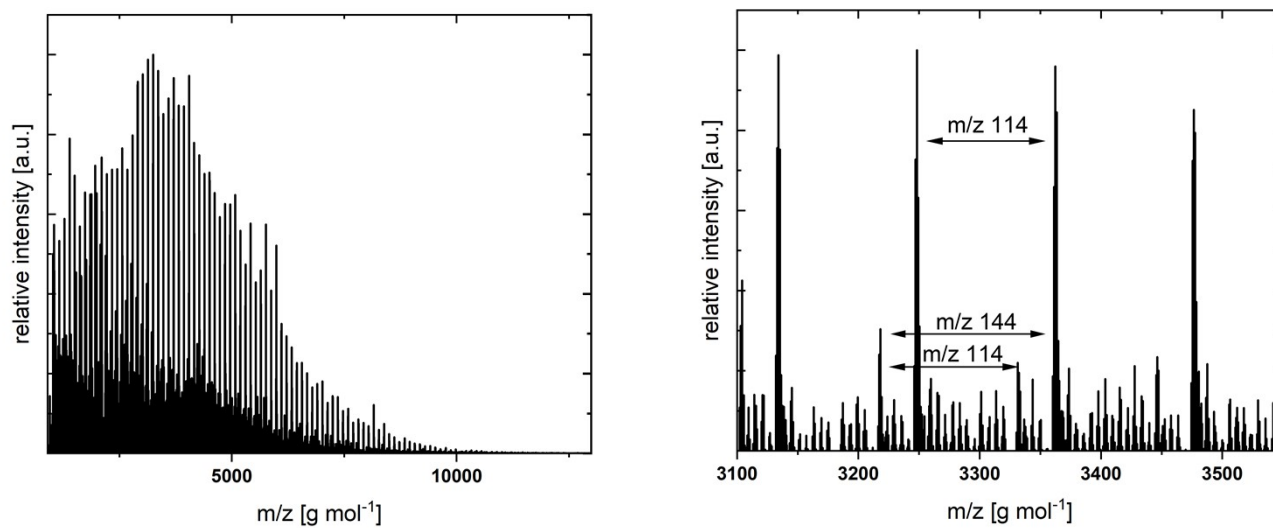

Figure S9.2 MALDI spectrum and excerpt of **PCL-*b*-PLLA-140-105**

## S10. Glycolide copolymerisation

**Table S10.1** PLGA copolymerisation data

| Type  | Reaction time | Temp [°C] | Monomer Feed (LA:GL) | Conv LA [%] | Conv GL [%] | Molar ratio LA:GL | (LA-GL) rel. molar fraction | I <sub>LA</sub> | I <sub>GL</sub> | R    |
|-------|---------------|-----------|----------------------|-------------|-------------|-------------------|-----------------------------|-----------------|-----------------|------|
| PLLGA | 25 h          | 105       | 1:1                  | 98          | >99         | 56:44             | 0.174                       | 6.4             | 5.1             | 0.35 |

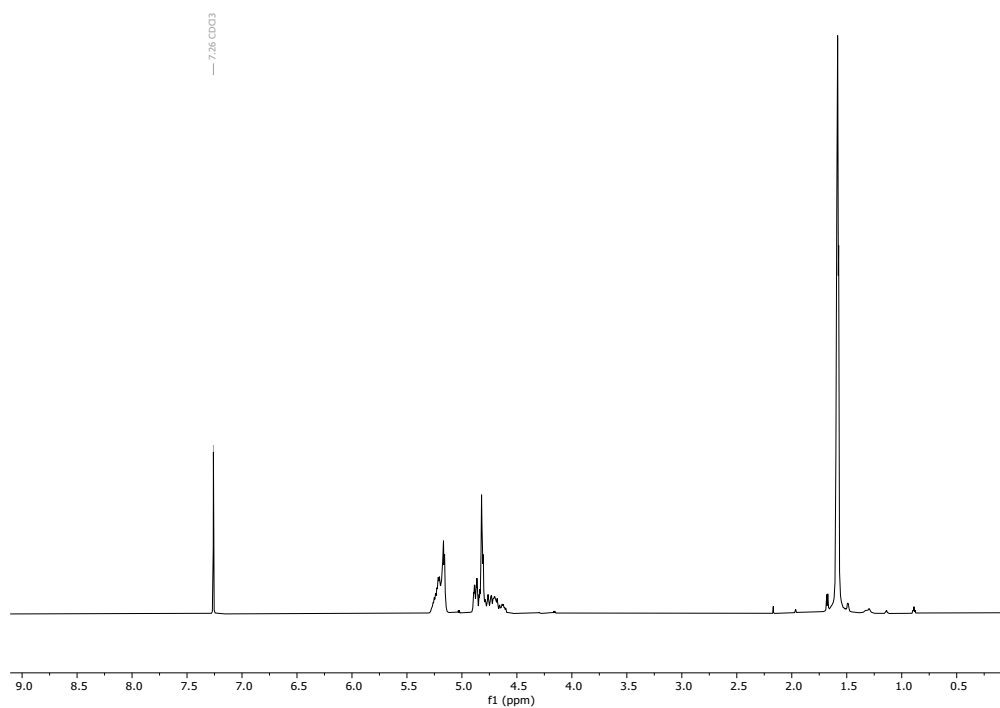

**Figure S10.1** <sup>1</sup>H-NMR spectrum of PLLGA (CDCl<sub>3</sub>)

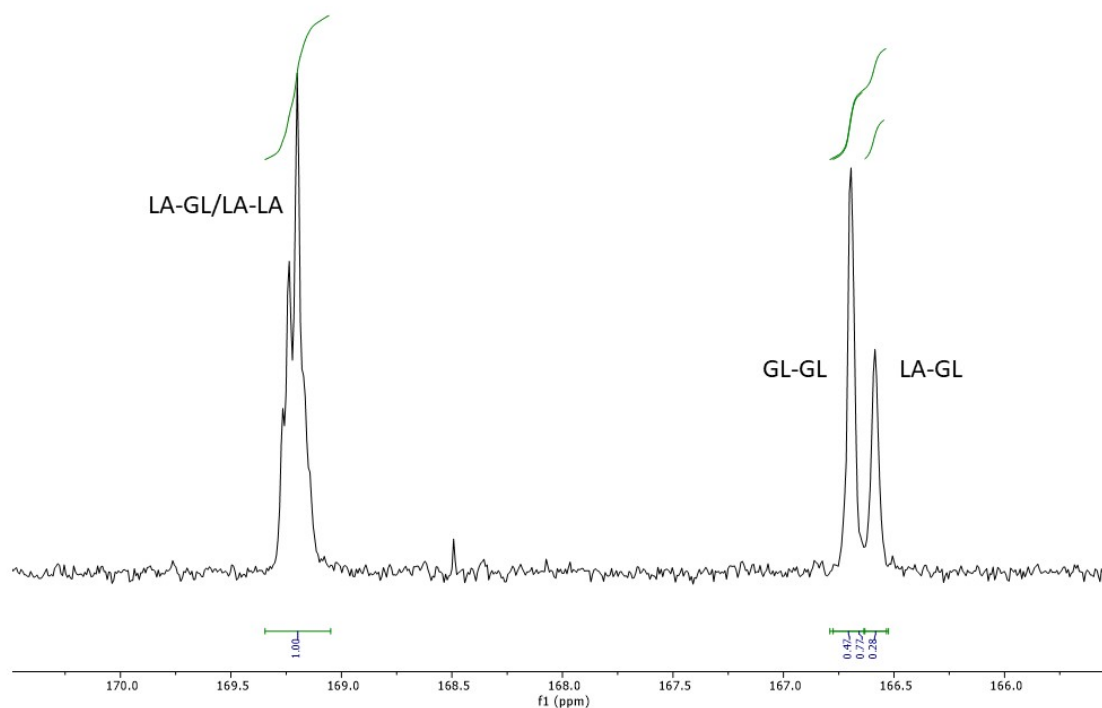

**Figure S10.2** <sup>13</sup>C-NMR spectrum excerpt (in DMSO-d<sub>6</sub>)



## S11. DSC investigations

**Table S11.1** Thermal data of representative polymers.

| Polymer                                    | T <sub>m1</sub><br>[°C] | ΔH <sub>m1</sub> [Jg <sup>-1</sup> ] | T <sub>m2</sub><br>[°C] | ΔH <sub>m2</sub> [Jg <sup>-1</sup> ] | ΔH <sub>c</sub><br>[Jg <sup>-1</sup> ] | X <sub>PLLA</sub> | X <sub>PCL</sub> |
|--------------------------------------------|-------------------------|--------------------------------------|-------------------------|--------------------------------------|----------------------------------------|-------------------|------------------|
| <b>PLLA</b>                                | 163-<br>168             | 59                                   | -                       | -                                    | -                                      | 63%               | -                |
| <b>PLLA-<i>b</i>-PCL</b>                   | 33                      | 3                                    | -                       | -                                    | 2                                      | -                 | 2%               |
| <b>PCL-<i>b</i>-<br/>PLLA-140-<br/>105</b> | 51                      | 45                                   | 142                     | 10                                   | -                                      | 20%               | 37%              |
| <b>PLLA-<i>grad</i>-<br/>PCL-105</b>       | 37                      | 10                                   | 113                     | 2                                    | 9                                      | 4%                | 2%               |

*Data are taken from the second heating and temperatures are peak values.*

Crystallinity X was calculated using

$$X = \frac{\Delta H_m - \Delta H_c}{\omega \Delta H_m^0} \times 100$$

where ΔH<sub>m</sub> and ΔH<sub>c</sub> are the melting and cold crystallisation enthalpies taken from the DSC, ΔH<sub>m</sub><sup>0</sup> is the melting enthalpy for a 100% crystalline polymer (93.7 Jg<sup>-1</sup> for PLLA[1] and 135 Jg<sup>-1</sup> for PCL[2]) and ω is the weight fraction of the respective polymer.

## References

- [1] S. Jia, D. Yu, Y. Zhu, Z. Wang, L. Chen, L. Fu, Morphology, Crystallization and Thermal Behaviors of PLA-Based Composites: Wonderful Effects of Hybrid GO/PEG via Dynamic Impregnating, *Polymers* (Basel) 9(10) (2017).
- [2] T.M. Diez-Rodriguez, E. Blazquez-Blazquez, N.L.C. Antunes, M.R. Ribeiro, E. Perez, M.L. Cerrada, Nanocomposites of PCL and SBA-15 Particles Prepared by Extrusion: Structural Characteristics, Confinement of PCL Chains within SBA-15 Nanometric Channels and Mechanical Behavior, *Polymers* (Basel) 14(1) (2021).
